# Supplementary material
Source: bioRxiv or medRxiv preprint supplement (https://medrxiv.org/highwire/filestream/75476/field_highwire_adjunct_files/0/2020.04.01.20050443-1.pdf)
Supplement: Supplementary file [file 2020.04.01.20050443-1.pdf]

Supplementary Information for:

**Can N95 respirators be reused after disinfection? And for how many times?**

Lei Liao<sup>1</sup>, Wang Xiao<sup>1</sup>, Mervin Zhao<sup>1</sup>, Xuanze Yu<sup>1</sup>, Haotian Wang<sup>1</sup>, Qiqi Wang<sup>1</sup>, Steven Chu<sup>2-3</sup>, Yi Cui<sup>4-5\*</sup>

<sup>1</sup>C Air, Inc., Sunnyvale CA, USA

<sup>2</sup>Department of Physics, Stanford University, Stanford CA, USA

<sup>3</sup>Department of Molecular and Cellular Physiology, Stanford University, Stanford CA, USA

<sup>4</sup>Department of Materials Science and Engineering, Stanford University, Stanford CA, USA

<sup>5</sup>Stanford Institute for Materials and Energy Sciences, SLAC National Accelerator Laboratory, Menlo Park CA, USA

\*Correspondence to: [yicui@stanford.edu](mailto:yicui@stanford.edu)

A

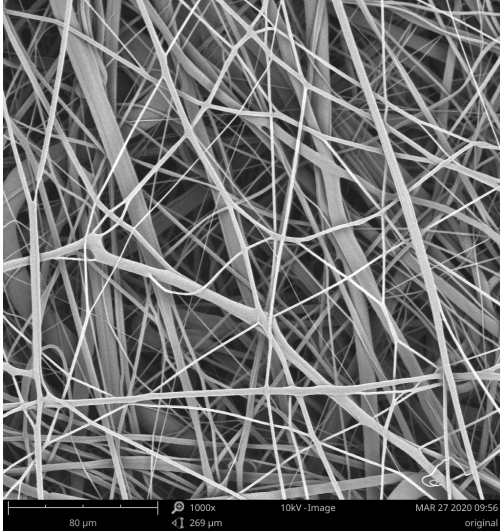

B

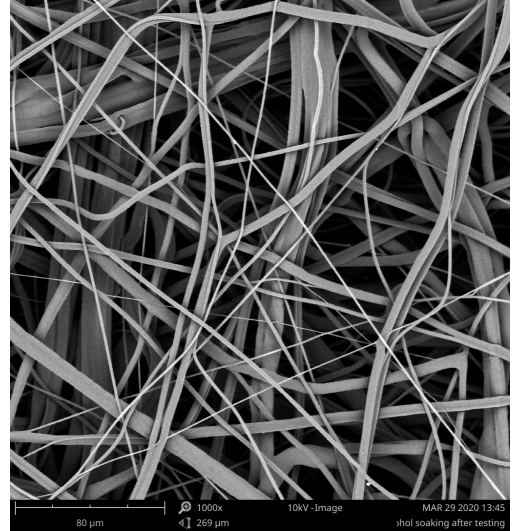

**Figure S1. Comparison of fibers before and after alcohol treatment. A. Before treatment, B. after treatment. No differences in morphology, or damages were observed.**

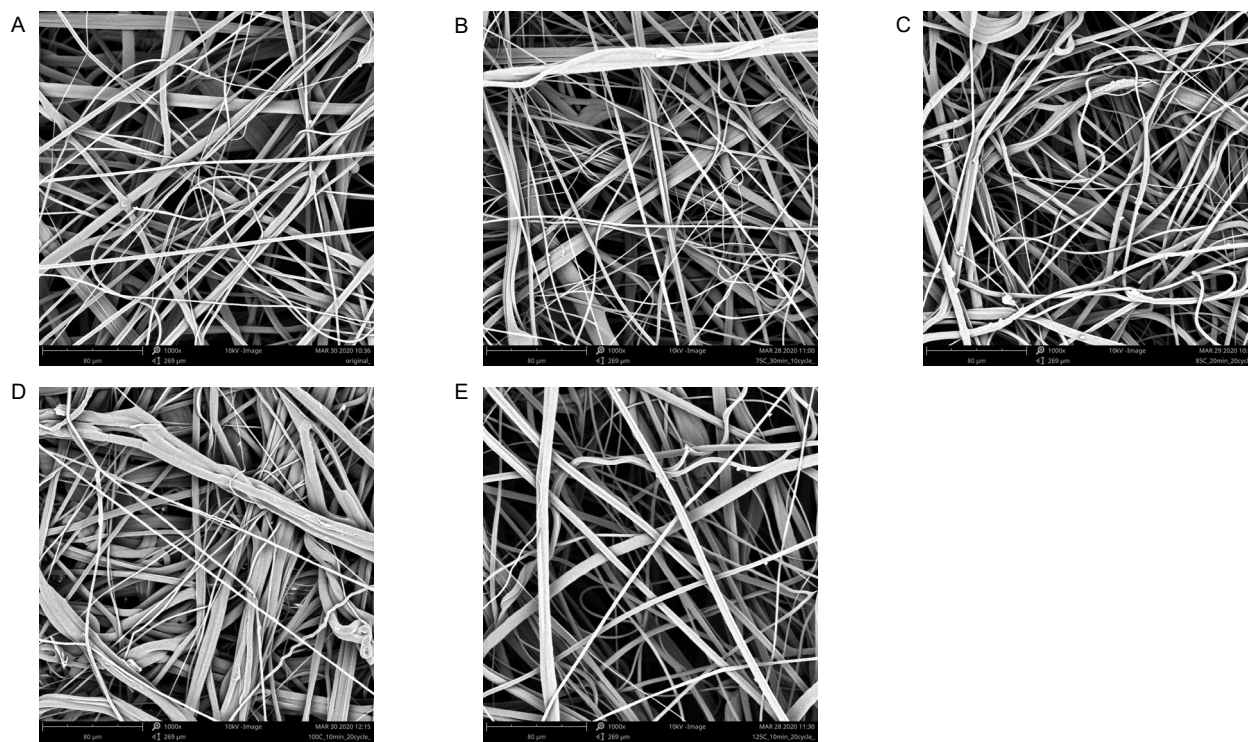

**Figure S2. SEM images of the meltblown fabric after different temperature treatments. A.** Original conditions. **B.** 75 °C (30 minutes). **C.** 85 °C (20 minutes). **D.** 100 °C (10 minutes). **E.** 125 °C (10 minutes). No significant changes were found in any of the heated samples compared with the original sample.

**Table S1. Filtration efficiency and pressure drop after ten-cycles of treatment.** We note that steam clearly had degradation in the filtration efficiency.

| Treatment          | Mode of application     | Treatment time (min)/cycle | Filtration efficiency (%) | Pressure drop (Pa) |
|--------------------|-------------------------|----------------------------|---------------------------|--------------------|
| Initial samples    |                         |                            | 96.52 ± 1.37              | 8.7 ± 1.0          |
| Dry heat (75 °C)   | Static-air oven         | 30                         | 97.25 ± 0.34              | 8.0 ± 1.0          |
| Steam              | Beaker of boiling water | 10                         | 80.65 ± 2.97              | 8.3 ± 1.2          |
| UVGI (254 nm, 8 W) | Sterilization cabinet   | 30                         | 96.78 ± 0.80              | 9.0 ± 1.7          |

**Table S2. Evolution of filtration efficiency based on steam treatment in a meltblown.** We see that after cycle 5 the efficiency has a significant drop.

| Cycle                | Efficiency (%) | Pressure drop (Pa) |
|----------------------|----------------|--------------------|
| Initial              | 96.52 ± 1.37   | 8.7 ± 1.0          |
| Steam (10 min/cycle) |                |                    |
| 1                    | 97.97 ± 0.41   | 10.0 ± 0.0         |
| 3                    | 96.41 ± 1.07   | 9.0 ± 1.0          |
| 5                    | 85.04 ± 1.05   | 7.3 ± 1.2          |
| 10                   | 80.65 ± 2.97   | 8.3 ± 1.2          |

**Table S3. Evolution of filtration efficiency with various temperatures in environmental chamber SH-642.** The humidity was set to the minimum set point, 30% RH at 85 °C. Above 85 °C the humidity cannot be well-controlled and will be <30% RH.

| Cycle                     | Efficiency (%) | Pressure Drop (Pa) |
|---------------------------|----------------|--------------------|
| Initial                   | 96.02 ± 1.35   | 8.3 ± 1.0          |
| 75 °C (30 minutes/cycle)  |                |                    |
| 1                         | 95.35 ± 0.96   | 8.0 ± 1.0          |
| 3                         | 94.99 ± 0.79   | 7.6 ± 0.5          |
| 5                         | 95.25 ± 0.77   | 7.3 ± 1.1          |
| 10                        | 95.94 ± 1.84   | 8.6 ± 0.5          |
| 15                        | 94.44 ± 0.37   | 7.0 ± 1.0          |
| 20                        | 96.49 ± 0.59   | 6.6 ± 0.5          |
| 85 °C (20 minutes/cycle)  |                |                    |
| 1                         | 95.96 ± 0.36   | 7.6 ± 0.5          |
| 3                         | 96.81 ± 0.85   | 7.6 ± 1.5          |
| 5                         | 95.56 ± 1.16   | 8.0 ± 1.7          |
| 10                        | 95.40 ± 0.27   | 7.6 ± 0.5          |
| 15                        | 96.07 ± 0.21   | 8.0 ± 1.7          |
| 20                        | 96.79 ± 0.18   | 9.0 ± 0.0          |
| 100 °C (10 minutes/cycle) |                |                    |
| 1                         | 94.71 ± 0.72   | 7.3 ± 0.5          |
| 3                         | 94.79 ± 0.30   | 8.0 ± 0.0          |
| 5                         | 94.58 ± 0.78   | 9.0 ± 1.0          |
| 10                        | 94.11 ± 1.37   | 8.6 ± 1.1          |
| 15                        | 95.95 ± 0.91   | 10.0 ± 1.0         |
| 20                        | 95.03 ± 1.31   | 9.6 ± 0.5          |
| 125 °C (10 minutes/cycle) |                |                    |
| 1                         | 96.23 ± 0.65   | 9.6 ± 1.1          |
| 3                         | 93.98 ± 0.38   | 9.6 ± 1.5          |
| 5                         | 91.08 ± 1.64   | 7.6 ± 0.5          |
| 10                        | 90.68 ± 1.01   | 8.3 ± 1.1          |
| 15                        | 90.94 ± 1.04   | 8.0 ± 1.7          |
| 20                        | 91.27 ± 1.62   | 8.0 ± 1.7          |
